# Supplementary material
Source: PubMed Central journal article supplement (PMC4480205)
Supplement: NIHMS677349-supplement-Supplemental_Figure.pdf [file NIHMS677349-supplement-Supplemental_Figure.pdf]

Supplemental Figure

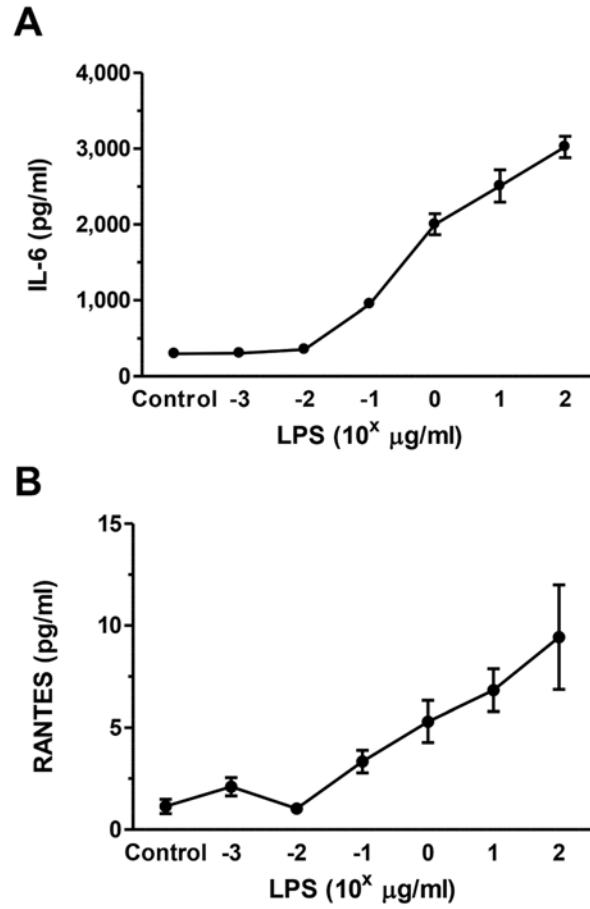

Dose response of LPS (1 ng/ml to 100  $\mu\text{g/ml}$ ) in the presence of fixed concentrations of MPLA (10  $\mu\text{g/ml}$ ) and CD14 (1  $\mu\text{g/ml}$ ) for both IL-6 and RANTES production after 16 hours of agonist exposure. Control indicates MPLA and CD14 in the absence of LPS. Exposure of LPS, MPLA and CD14 occurred concurrently for escalating LPS concentrations. Data are expressed as means  $\pm$  SE of a single, replicated experiment ( $n = 4$  per group).
